# Supplementary material for: Distribution of quinolone resistance gene (qnr) in ESBL-producing Escherichia coli and Klebsiella spp. in Lomé, Togo
Source: Springer Nature journal article supplement (doi:10.1186/s13756-019-0552-0), 2019-06-18
Supplement: MOESM1 [file 16823514]

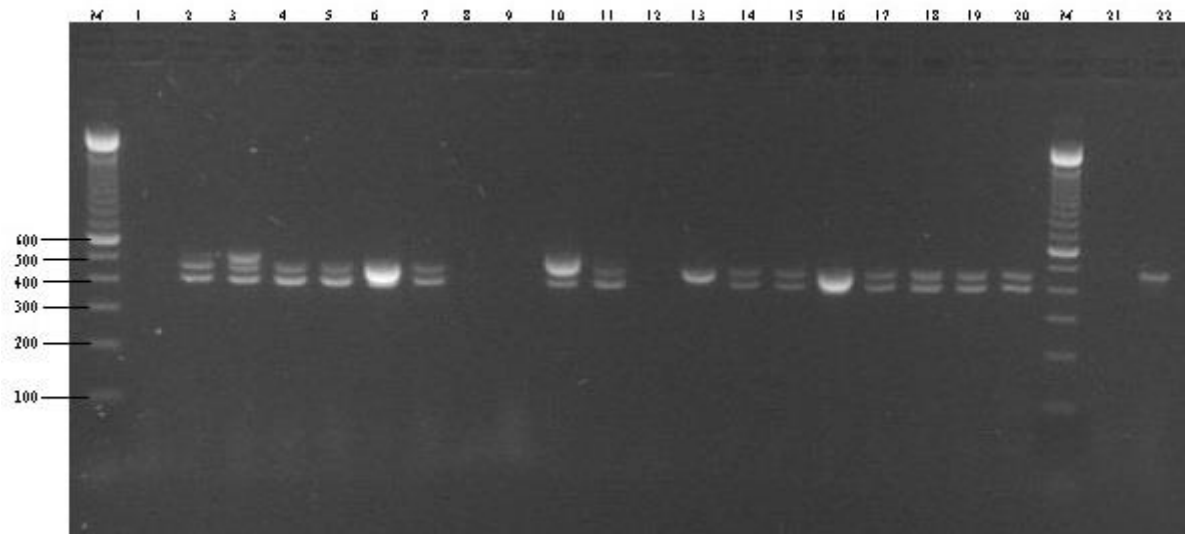

Figure 2: Agarose gel electrophoresis (2%) used for the separation of multiplex PCR products. M: molecular size marker (100 bp ladder, Promega, USA); line 1, 8, 9, 12: negative; line 2, 4, 5, 7, 10, 11, 14, 15, 17, 18, 19, 20: *qnr B* + *qnr S* genes; line 3: *qnr A* + *qnr B* + *qnr S* genes; line 6: *qnr S* genes; line 13: *qnr B* genes; line 21: negative control and line 22: positive control *qnr B* genes. *Qnr A* (517 bp), *qnr B* (469 bp), *qnr S* (417 bp).
